# Supplementary material for: Immune-Related Endocrine Dysfunctions in Combined Modalities of Treatment: Real-World Data
Source: MDPI journal article supplement (doi:10.3390/cancers13153797), 2021-07-28
Supplement: s1 [file s1]

Supplementary

# Immune-Related Endocrine Dysfunctions in Combined Modalities of Treatment: Real-World Data

Wing-Lok Chan et al.

**Table S1.** Targeted therapies used concurrently with immune-checkpoint inhibitors in this study.

| Targeted therapy used   | No. of patients |
|-------------------------|-----------------|
| Total                   | 54              |
| Aflibercept             | 2               |
| Axitinib                | 9               |
| Avastin                 | 7               |
| Cabozatinib             | 1               |
| Cetuximab               | 1               |
| Dabrafenib, trametinib  | 1               |
| Everolimus              | 1               |
| Gefitinib               | 1               |
| Lapatinib               | 1               |
| Lenvatinib              | 19              |
| Olaparib/ talazoparib   | 2               |
| Ramucirumab             | 1               |
| Regorafenib             | 1               |
| Sorafenib               | 2               |
| Temsirolimus            | 1               |
| Trastuzumab, pertuzumab | 4               |

**Table S2.** Number and percentage of Grade 3/4 toxicities.

| <b>G3/4 immune-related adverse effects</b> | <b>Total number of cases</b> | <b>ICI-alone<br/><i>n</i> (%)</b> | <b>Dual-ICI<br/><i>n</i> (%)</b> | <b>Chemo+ICI<br/><i>n</i> (%)</b> | <b>Targeted+ICI<br/><i>n</i> (%)</b> |
|--------------------------------------------|------------------------------|-----------------------------------|----------------------------------|-----------------------------------|--------------------------------------|
| Acute renal impairment                     | 3                            | 2 (3.7%)                          | 0 (0%)                           | 0 (0%)                            | 1 (14.3%)                            |
| Colitis/ Diarrhea                          | 5                            | 2 (3.7%)                          | 1 (11.1%)                        | 0 (0%)                            | 2 (28.6%)                            |
| Deranged liver function                    | 12                           | 8 (14.8%)                         | 2 (22.2%)                        | 2 (18.2%)                         | 0 (0%)                               |
| Infusional reaction                        | 3                            | 3 (5.6%)                          | 0 (0%)                           | 0 (0%)                            | 0 (0%)                               |
| Immune thrombocytopenic purpura            | 3                            | 3 (5.6%)                          | 0 (0%)                           | 0 (0%)                            | 0 (0%)                               |
| Malaise                                    | 6                            | 4 (7.4%)                          | 0 (0%)                           | 2 (18.2%)                         | 0 (0%)                               |
| Neurological symptoms                      | 1                            | 0 (0%)                            | 0 (0%)                           | 1 (9.1%)                          | 0 (0%)                               |
| Pancreatitis                               | 1                            | 0 (0%)                            | 0 (0%)                           | 1 (9.1%)                          | 0 (0%)                               |
| Pneumonitis                                | 11                           | 7 (13%)                           | 0 (0%)                           | 4 (36.4%)                         | 0 (0%)                               |
| Immune-related arthritis                   | 7                            | 6 (11.1%)                         | 1 (11.1%)                        | 0 (0%)                            | 0 (0%)                               |
| Rashes                                     | 29                           | 19 (35.2%)                        | 5 (55.6%)                        | 1 (9.1%)                          | 4 (57.1%)                            |
